# Supplementary material for: Single-Stranded Annealing Induced by Re-Initiation of Replication Origins Provides a Novel and Efficient Mechanism for Generating Copy Number Expansion via Non-Allelic Homologous Recombination
Source: PubMed Central journal article supplement (PMC3536649; doi:10.1371/journal.pgen.1003192), 2013-01-03

# Figure S2

A

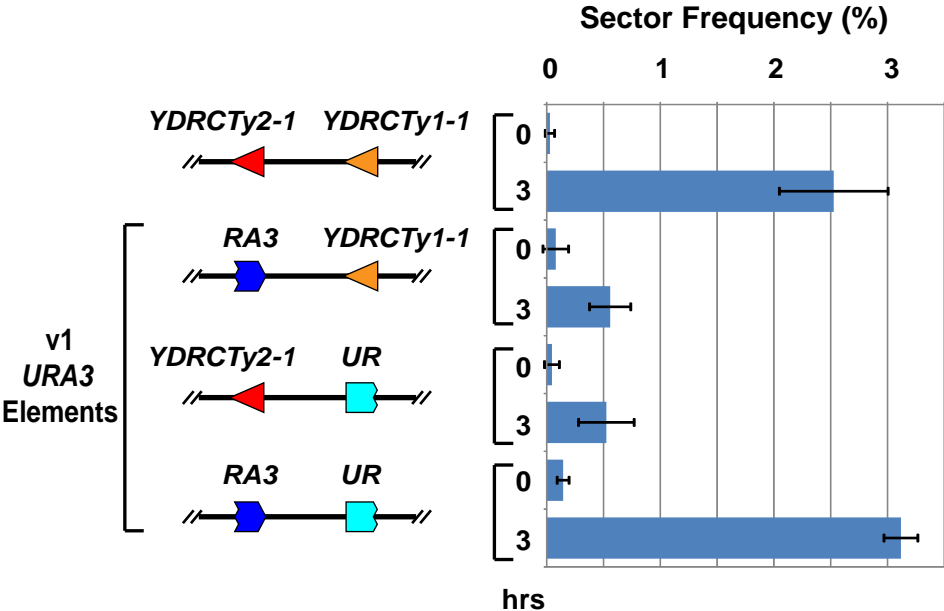

B

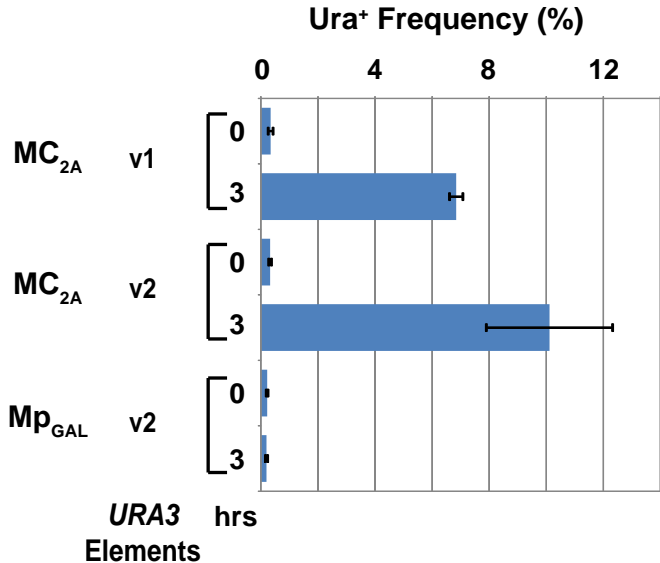

Supplement: pgen.1003192.s002.pdf [file pgen.1003192.s002.pdf]
