# Supplementary material for: Single-Stranded Annealing Induced by Re-Initiation of Replication Origins Provides a Novel and Efficient Mechanism for Generating Copy Number Expansion via Non-Allelic Homologous Recombination
Source: PubMed Central journal article supplement (PMC3536649; doi:10.1371/journal.pgen.1003192), 2013-01-03

# Figure S6

**A**

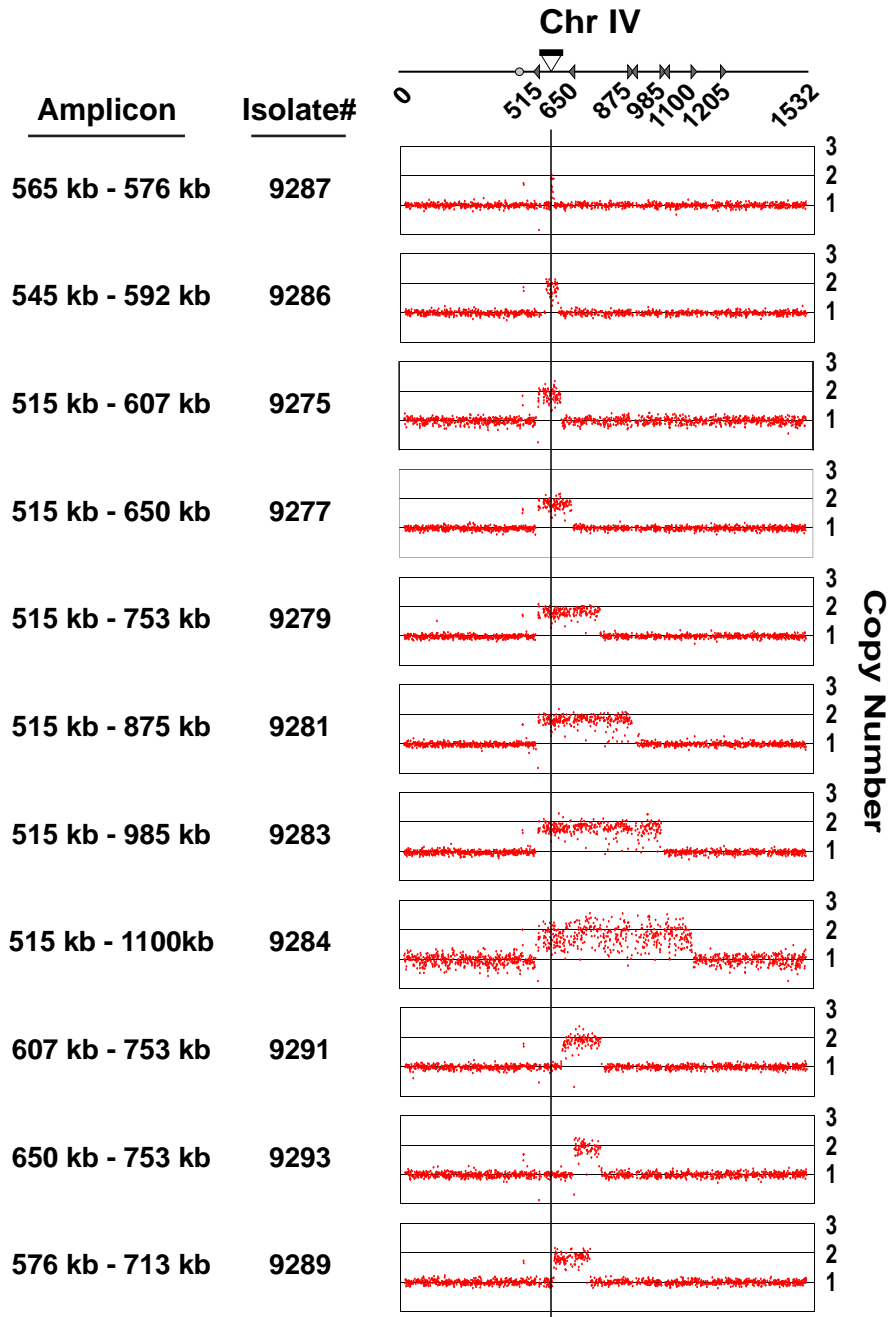

**B**

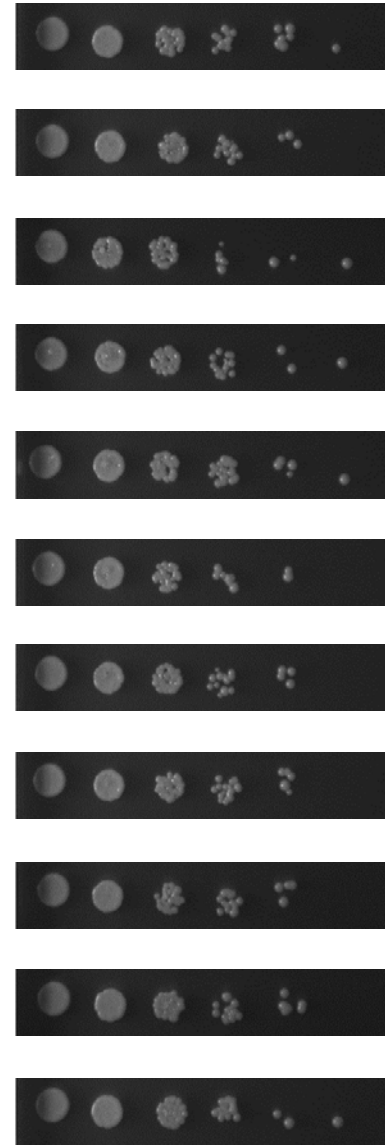

Supplement: pgen.1003192.s006.pdf [file pgen.1003192.s006.pdf]
