# Supplementary material for: Single-Stranded Annealing Induced by Re-Initiation of Replication Origins Provides a Novel and Efficient Mechanism for Generating Copy Number Expansion via Non-Allelic Homologous Recombination
Source: PubMed Central journal article supplement (PMC3536649; doi:10.1371/journal.pgen.1003192), 2013-01-03
Supplement: pgen.1003192.s010.pdf [file pgen.1003192.s010.pdf]

**Table S3**

Frequency of uracil prototrophs from the selection assay observed in this work.

| Parent Strain    | Genotype                                                                        | Time | # Trials | Total cfu Tested | Mean Ura <sup>+</sup> Frequency | Standard Deviation | Standard Error of the Mean |
|------------------|---------------------------------------------------------------------------------|------|----------|------------------|---------------------------------|--------------------|----------------------------|
| YJL8112/<br>8113 | <i>MCM7-2NLS pGAL-ΔntCDC6-cdk2A ydrcty2-1::RA3(v1) ydrcty1-1::UR(v1)</i>        | 0 hr | 2        | 53750            | 0.34%                           | 0.08%              | 0.06%                      |
| YJL8112/<br>8113 | <i>MCM7-2NLS pGAL-ΔntCDC6-cdk2A ydrcty2-1::RA3(v1) ydrcty1-1::UR(v1)</i>        | 3 hr | 2        | 35500            | 6.85%                           | 0.23%              | 0.17%                      |
| YJL8363/<br>8364 | <i>MCM7-2NLS pGAL-ΔntCDC6-cdk2A ydrcty2-1::RA3(v2) ydrcty1-1::UR(v2)</i>        | 0 hr | 5        | 109850           | 0.32%                           | 0.05%              | 0.02%                      |
| YJL8363/<br>8364 | <i>MCM7-2NLS pGAL-ΔntCDC6-cdk2A ydrcty2-1::RA3(v2) ydrcty1-1::UR(v2)</i>        | 3 hr | 5        | 91000            | 10.12%                          | 2.21%              | 0.99%                      |
| YJL9149-<br>9151 | <i>MCM7-2NLS pGAL ydrcty2-1::RA3(v2) ydrcty1-1::UR(v2)</i>                      | 0 hr | 3        | 48150            | 0.22%                           | 0.03%              | 0.02%                      |
| YJL9149-<br>9151 | <i>MCM7-2NLS pGAL ydrcty2-1::RA3(v2) ydrcty1-1::UR(v2)</i>                      | 3 hr | 3        | 64950            | 0.20%                           | 0.04%              | 0.02%                      |
| YJL8407/<br>8408 | <i>dnl4Δ MCM7-2NLS pGAL-ΔntCDC6-cdk2A ydrcty2-1::RA3(v2) ydrcty1-1::UR(v2)</i>  | 0 hr | 2        | 42650            | 0.17%                           | 0.01%              | 0.01%                      |
| YJL8407/<br>8408 | <i>dnl4Δ MCM7-2NLS pGAL-ΔntCDC6-cdk2A ydrcty2-1::RA3(v2) ydrcty1-1::UR(v2)</i>  | 3 hr | 2        | 25800            | 10.13%                          | 1.16%              | 0.82%                      |
| YJL8409/<br>8410 | <i>rad52Δ MCM7-2NLS pGAL-ΔntCDC6-cdk2A ydrcty2-1::RA3(v2) ydrcty1-1::UR(v2)</i> | 0 hr | 2        | 34850            | 0.00%                           | 0.00%              | 0.00%                      |
| YJL8409/<br>8410 | <i>rad52Δ MCM7-2NLS pGAL-ΔntCDC6-cdk2A ydrcty2-1::RA3(v2) ydrcty1-1::UR(v2)</i> | 3 hr | 2        | 12050            | 0.04%                           | 0.02%              | 0.02%                      |

**Table S3 (continued)**

Frequency of uracil prototrophs from the selection assay observed in this work

| Parent Strain    | Genotype                                                                                   | Time | # Trials | Total cfu Tested | Mean Ura <sup>+</sup> Frequency | Standard Deviation | Standard Error of the Mean |
|------------------|--------------------------------------------------------------------------------------------|------|----------|------------------|---------------------------------|--------------------|----------------------------|
| YJL8412/<br>8413 | <i>rad51</i> Δ <i>MCM7-2NLS pGAL-ΔntCDC6-cdk2A ydrcty2-1::RA3(v2) ydrcty1-1::UR(v2)</i>    | 0 hr | 2        | 35150            | 0.15%                           | 0.05%              | 0.04%                      |
| YJL8412/<br>8413 | <i>rad51</i> Δ <i>MCM7-2NLS pGAL-ΔntCDC6-cdk2A ydrcty2-1::RA3(v2) ydrcty1-1::UR(v2)</i>    | 3 hr | 2        | 25000            | 8.42%                           | 0.15%              | 0.11%                      |
| YJL8415/<br>8416 | <i>rad1</i> Δ <i>MCM7-2NLS pGAL-ΔntCDC6-cdk2A ydrcty2-1::RA3(v2) ydrcty1-1::UR(v2)</i>     | 0 hr | 2        | 29100            | 0.00%                           | 0.00%              | 0.00%                      |
| YJL8415/<br>8416 | <i>rad1</i> Δ <i>MCM7-2NLS pGAL-ΔntCDC6-cdk2A ydrcty2-1::RA3(v2) ydrcty1-1::UR(v2)</i>     | 3 hr | 2        | 11550            | 0.41%                           | 0.03%              | 0.02%                      |
| YJL8418/<br>8419 | <i>msh3</i> Δ <i>MCM7-2NLS pGAL-ΔntCDC6-cdk2A ydrcty2-1::RA3(v2) ydrcty1-1::UR(v2)</i>     | 0 hr | 2        | 30900            | 0.01%                           | 0.00%              | 0.00%                      |
| YJL8418/<br>8419 | <i>msh3</i> Δ <i>MCM7-2NLS pGAL-ΔntCDC6-cdk2A ydrcty2-1::RA3(v2) ydrcty1-1::UR(v2)</i>     | 3 hr | 2        | 12450            | 1.19%                           | 0.16%              | 0.11%                      |
| YJL8421/<br>8422 | <i>pol32</i> Δ <i>MCM7-2NLS pGAL-ΔntCDC6-cdk2A ydrcty2-1::RA3(v2) ydrcty1-1::UR(v2)</i>    | 0 hr | 2        | 20100            | 0.04%                           | 0.01%              | 0.01%                      |
| YJL8421/<br>8422 | <i>pol32</i> Δ <i>MCM7-2NLS pGAL-ΔntCDC6-cdk2A ydrcty2-1::RA3(v2) ydrcty1-1::UR(v2)</i>    | 3 hr | 2        | 8850             | 4.82%                           | 0.03%              | 0.02%                      |
| YJL9115/<br>9116 | <i>MCM7-2NLS pGAL-ΔntCDC6-cdk2A ydrcty2-1Δ ydrcty1-1Δ ChrIV_515kb::RA3 ChrIV_607kb::UR</i> | 0 hr | 3        | 46950            | 0.48%                           | 0.10%              | 0.06%                      |
| YJL9115/<br>9116 | <i>MCM7-2NLS pGAL-ΔntCDC6-cdk2A ydrcty2-1Δ ydrcty1-1Δ ChrIV_515kb::RA3 ChrIV_607kb::UR</i> | 3 hr | 3        | 42750            | 9.86%                           | 0.51%              | 0.29%                      |

**Table S3 (continued)**

Frequency of uracil prototrophs from the selection assay observed in this work

| Parent Strain    | Genotype                                                                                    | Time | # Trials | Total cfu Tested | Mean Ura <sup>+</sup> Frequency | Standard Deviation | Standard Error of the Mean |
|------------------|---------------------------------------------------------------------------------------------|------|----------|------------------|---------------------------------|--------------------|----------------------------|
| YJL9118/<br>9119 | <i>MCM7-2NLS pGAL-ΔntCDC6-cdk2A ydrcty2-1Δ ydrcty1-1Δ ChrIV_515kb::RA3 ChrIV_650kb::UR</i>  | 0 hr | 3        | 49500            | 0.25%                           | 0.01%              | 0.00%                      |
| YJL9118/<br>9119 | <i>MCM7-2NLS pGAL-ΔntCDC6-cdk2A ydrcty2-1Δ ydrcty1-1Δ ChrIV_515kb::RA3 ChrIV_650kb::UR</i>  | 3 hr | 3        | 45300            | 8.78%                           | 0.26%              | 0.15%                      |
| YJL9121/<br>9122 | <i>MCM7-2NLS pGAL-ΔntCDC6-cdk2A ydrcty2-1Δ ydrcty1-1Δ ChrIV_515kb::RA3 ChrIV_753kb::UR</i>  | 0 hr | 3        | 49350            | 0.12%                           | 0.01%              | 0.01%                      |
| YJL9121/<br>9122 | <i>MCM7-2NLS pGAL-ΔntCDC6-cdk2A ydrcty2-1Δ ydrcty1-1Δ ChrIV_515kb::RA3 ChrIV_753kb::UR</i>  | 3 hr | 3        | 42450            | 3.06%                           | 0.55%              | 0.32%                      |
| YJL9127/<br>9128 | <i>MCM7-2NLS pGAL-ΔntCDC6-cdk2A ydrcty2-1Δ ydrcty1-1Δ ChrIV_515kb::RA3 ChrIV_875kb::UR</i>  | 0 hr | 3        | 50100            | 0.05%                           | 0.02%              | 0.01%                      |
| YJL9127/<br>9128 | <i>MCM7-2NLS pGAL-ΔntCDC6-cdk2A ydrcty2-1Δ ydrcty1-1Δ ChrIV_515kb::RA3 ChrIV_875kb::UR</i>  | 3 hr | 3        | 43200            | 1.15%                           | 0.12%              | 0.07%                      |
| YJL9130/<br>9131 | <i>MCM7-2NLS pGAL-ΔntCDC6-cdk2A ydrcty2-1Δ ydrcty1-1Δ ChrIV_515kb::RA3 ChrIV_985kb::UR</i>  | 0 hr | 3        | 50550            | 0.01%                           | 0.01%              | 0.01%                      |
| YJL9130/<br>9131 | <i>MCM7-2NLS pGAL-ΔntCDC6-cdk2A ydrcty2-1Δ ydrcty1-1Δ ChrIV_515kb::RA3 ChrIV_985kb::UR</i>  | 3 hr | 3        | 38400            | 0.15%                           | 0.05%              | 0.03%                      |
| YJL9133/<br>9134 | <i>MCM7-2NLS pGAL-ΔntCDC6-cdk2A ydrcty2-1Δ ydrcty1-1Δ ChrIV_515kb::RA3 ChrIV_1100kb::UR</i> | 0 hr | 3        | 49500            | 0.00%                           | 0.01%              | 0.00%                      |
| YJL9133/<br>9134 | <i>MCM7-2NLS pGAL-ΔntCDC6-cdk2A ydrcty2-1Δ ydrcty1-1Δ ChrIV_515kb::RA3 ChrIV_1100kb::UR</i> | 3 hr | 3        | 40650            | 0.08%                           | 0.03%              | 0.01%                      |

**Table S3 (continued)**

Frequency of uracil prototrophs from the selection assay observed in this work

| Parent Strain    | Genotype                                                                                           | Time | # Trials | Total cfu Tested | Mean Ura <sup>+</sup> Frequency | Standard Deviation | Standard Error of the Mean |
|------------------|----------------------------------------------------------------------------------------------------|------|----------|------------------|---------------------------------|--------------------|----------------------------|
| YJL9136/<br>9137 | <i>MCM7-2NLS pGAL-ΔntCDC6-cdk2A<br/>ydrcty2-1Δ ydrcty1-1Δ<br/>ChrIV_545kb::RA3 ChrIV_592kb::UR</i> | 0 hr | 3        | 46950            | 0.79%                           | 0.22%              | 0.12%                      |
| YJL9136/<br>9137 | <i>MCM7-2NLS pGAL-ΔntCDC6-cdk2A<br/>ydrcty2-1Δ ydrcty1-1Δ<br/>ChrIV_545kb::RA3 ChrIV_592kb::UR</i> | 3 hr | 3        | 44100            | 13.29%                          | 0.40%              | 0.23%                      |
| YJL9139/<br>9140 | <i>MCM7-2NLS pGAL-ΔntCDC6-cdk2A<br/>ydrcty2-1Δ ydrcty1-1Δ<br/>ChrIV_565kb::RA3 ChrIV_576kb::UR</i> | 0 hr | 3        | 46800            | 0.44%                           | 0.10%              | 0.06%                      |
| YJL9139/<br>9140 | <i>MCM7-2NLS pGAL-ΔntCDC6-cdk2A<br/>ydrcty2-1Δ ydrcty1-1Δ<br/>ChrIV_565kb::RA3 ChrIV_576kb::UR</i> | 3 hr | 3        | 43500            | 11.47%                          | 1.32%              | 0.76%                      |
| YJL9142/<br>9143 | <i>MCM7-2NLS pGAL-ΔntCDC6-cdk2A<br/>ydrcty2-1Δ ydrcty1-1Δ<br/>ChrIV_576kb::RA3 ChrIV_713kb::UR</i> | 0 hr | 3        | 50850            | 0.04%                           | 0.01%              | 0.00%                      |
| YJL9142/<br>9143 | <i>MCM7-2NLS pGAL-ΔntCDC6-cdk2A<br/>ydrcty2-1Δ ydrcty1-1Δ<br/>ChrIV_576kb::RA3 ChrIV_713kb::UR</i> | 3 hr | 3        | 38850            | 2.09%                           | 0.37%              | 0.22%                      |
| YJL9145/<br>9146 | <i>MCM7-2NLS pGAL-ΔntCDC6-cdk2A<br/>ydrcty2-1Δ ydrcty1-1Δ<br/>ChrIV_607kb::RA3 ChrIV_753kb::UR</i> | 0 hr | 3        | 50100            | 0.02%                           | 0.01%              | 0.01%                      |
| YJL9145/<br>9146 | <i>MCM7-2NLS pGAL-ΔntCDC6-cdk2A<br/>ydrcty2-1Δ ydrcty1-1Δ<br/>ChrIV_607kb::RA3 ChrIV_753kb::UR</i> | 3 hr | 3        | 42300            | 0.55%                           | 0.08%              | 0.05%                      |
| YJL9147/<br>9148 | <i>MCM7-2NLS pGAL-ΔntCDC6-cdk2A<br/>ydrcty2-1Δ ydrcty1-1Δ<br/>ChrIV_650kb::RA3 ChrIV_753kb::UR</i> | 0 hr | 3        | 46050            | 0.05%                           | 0.04%              | 0.02%                      |
| YJL9147/<br>9148 | <i>MCM7-2NLS pGAL-ΔntCDC6-cdk2A<br/>ydrcty2-1Δ ydrcty1-1Δ<br/>ChrIV_650kb::RA3 ChrIV_753kb::UR</i> | 3 hr | 3        | 41550            | 0.23%                           | 0.04%              | 0.02%                      |
