# Supplementary material for: Single-Stranded Annealing Induced by Re-Initiation of Replication Origins Provides a Novel and Efficient Mechanism for Generating Copy Number Expansion via Non-Allelic Homologous Recombination
Source: PubMed Central journal article supplement (PMC3536649; doi:10.1371/journal.pgen.1003192), 2013-01-03
Supplement: pgen.1003192.s011.pdf [file pgen.1003192.s011.pdf]

**Table S4**

aCGH analysis of uracil prototroph isolates.

| Parent Strain | Isolate | Timepont | Copy Number | Amplicon Boundaries (kb) | Other CGH Changes                             |
|---------------|---------|----------|-------------|--------------------------|-----------------------------------------------|
| YJL8112       | YJL8431 | 0 hr     | 2           | 515 to 650               | none                                          |
| YJL8112       | YJL8432 | 0 hr     | 2           | 515 to 650               | ChrV Disomy*                                  |
| YJL8112       | YJL8433 | 0 hr     | 2           | 515 to 650               | none                                          |
| YJL8113       | YJL8434 | 0 hr     | 2           | 515 to 650               | none                                          |
| YJL8113       | YJL8435 | 0 hr     | 3           | 515 to 650               | none                                          |
| YJL8113       | YJL8436 | 0 hr     | 2           | 515 to 650               | ChrII Disomy; ChrVII Disomy                   |
| YJL8363       | YJL8437 | 0 hr     | 2           | 515 to 650               | none                                          |
| YJL8363       | YJL8438 | 0 hr     | 2           | 515 to 650               | none                                          |
| YJL8363       | YJL8439 | 0 hr     | 2           | 515 to 650               | none                                          |
| YJL8364       | YJL8440 | 0 hr     | 2           | 515 to 650               | none                                          |
| YJL8364       | YJL8441 | 0 hr     | 2           | 515 to 650               | none                                          |
| YJL8364       | YJL8442 | 0 hr     | 2           | 515 to 650               | none                                          |
| YJL8112       | YJL8443 | 3 hr     | 2           | 515 to 650               | none                                          |
| YJL8112       | YJL8444 | 3 hr     | 2           | 515 to 650               | none                                          |
| YJL8112       | YJL8445 | 3 hr     | 2           | 515 to 650               | ChrX Disomy                                   |
| YJL8112       | YJL8446 | 3 hr     | 3           | 515 to 650               | none                                          |
| YJL8112       | YJL8447 | 3 hr     | 2           | 515 to 650               | none                                          |
| YJL8112       | YJL8448 | 3 hr     | 3           | 515 to 650               | none                                          |
| YJL8112       | YJL8449 | 3 hr     | 2           | 515 to 650               | none                                          |
| YJL8112       | YJL8450 | 3 hr     | 2           | 515 to 650               | none                                          |
| YJL8113       | YJL8451 | 3 hr     | 2           | 515 to 650               | none                                          |
| YJL8113       | YJL8452 | 3 hr     | 2           | 515 to 650               | none                                          |
| YJL8113       | YJL8453 | 3 hr     | 2           | 515 to 650               | none                                          |
| YJL8113       | YJL8454 | 3 hr     | 2‡          | 515 to 650               | ChrI Disomy; ChrIX Disomy; ChrXIII Disomy(?)* |
| YJL8113       | YJL8455 | 3 hr     | 2           | 515 to 650               | none                                          |
| YJL8113       | YJL8456 | 3 hr     | 2           | 515 to 650               | none                                          |

**Table S4 (continued)**

aCGH analysis of uracil prototroph isolates.

|         |         |      |      |            |                                                                                                                                                                                                                                                  |
|---------|---------|------|------|------------|--------------------------------------------------------------------------------------------------------------------------------------------------------------------------------------------------------------------------------------------------|
| YJL8113 | YJL8457 | 3 hr | 2‡   | 515 to 650 | ChrXVI Disomy*                                                                                                                                                                                                                                   |
| YJL8113 | YJL8458 | 3 hr | 2    | 515 to 650 | none                                                                                                                                                                                                                                             |
| YJL8363 | YJL8459 | 3 hr | 2    | 515 to 650 | none                                                                                                                                                                                                                                             |
| YJL8363 | YJL8460 | 3 hr | 2    | 515 to 650 | none                                                                                                                                                                                                                                             |
| YJL8363 | YJL8461 | 3 hr | 1.5† | 515 to 650 | Segmental Duplication of ChrIII_TEL-167kb;<br>Segmental Duplication of ChrVII_541-820kb*                                                                                                                                                         |
| YJL8363 | YJL8462 | 3 hr | 1.5† | 515 to 650 | ChrXV Disomy*                                                                                                                                                                                                                                    |
| YJL8363 | YJL8463 | 3 hr | 2    | 515 to 650 | none                                                                                                                                                                                                                                             |
| YJL8363 | YJL8464 | 3 hr | 2    | 515 to 650 | none                                                                                                                                                                                                                                             |
| YJL8363 | YJL8465 | 3 hr | 2    | 515 to 650 | none                                                                                                                                                                                                                                             |
| YJL8363 | YJL8466 | 3 hr | 2‡   | 515 to 650 | Segmental Duplication(?) of ChrIV_TEL-515kb;<br>Segmental Duplication(?) of ChrIV_650-875kb;<br>Segmental Duplication(?) of ChrIV_985kb-TEL;<br>Segmental Duplication(?) of ChrXII_947kb-TEL;<br>Segmental Duplication(?) of ChrXIII_TEL-363 kb* |
| YJL8364 | YJL8467 | 3 hr | 2    | 515 to 650 | none                                                                                                                                                                                                                                             |
| YJL8364 | YJL8468 | 3 hr | 2    | 515 to 650 | none                                                                                                                                                                                                                                             |
| YJL8364 | YJL8469 | 3 hr | 1.5† | 515 to 650 | none*                                                                                                                                                                                                                                            |
| YJL8364 | YJL8470 | 3 hr | 1.5† | 515 to 650 | ChrIV Disomy; ChrXIII Disomy*                                                                                                                                                                                                                    |
| YJL8364 | YJL8471 | 3 hr | 2    | 515 to 650 | none                                                                                                                                                                                                                                             |
| YJL8364 | YJL8472 | 3 hr | 2    | 515 to 650 | none                                                                                                                                                                                                                                             |
| YJL8364 | YJL8473 | 3 hr | 2    | 515 to 650 | none                                                                                                                                                                                                                                             |
| YJL8364 | YJL8474 | 3 hr | 2    | 515 to 650 | none                                                                                                                                                                                                                                             |
| YJL9139 | YJL9287 | 3 hr | 2    | 565 to 576 | none                                                                                                                                                                                                                                             |
| YJL9136 | YJL9286 | 3 hr | 2    | 545 to 592 | none                                                                                                                                                                                                                                             |
| YJL9115 | YJL9275 | 3 hr | 2    | 515 to 607 | none                                                                                                                                                                                                                                             |
| YJL9118 | YJL9277 | 3 hr | 2    | 515 to 650 | none                                                                                                                                                                                                                                             |
| YJL9121 | YJL9279 | 3 hr | 2    | 515 to 753 | none                                                                                                                                                                                                                                             |
| YJL9127 | YJL9281 | 3 hr | 2    | 515 to 875 | none                                                                                                                                                                                                                                             |
| YJL9130 | YJL9283 | 3 hr | 2    | 515 to 985 | none                                                                                                                                                                                                                                             |

## Table S4 (continued)

aCGH analysis of uracil prototroph isolates.

|         |         |      |   |             |      |
|---------|---------|------|---|-------------|------|
| YJL9133 | YJL9284 | 3 hr | 2 | 515 to 1100 | none |
| YJL9145 | YJL9291 | 3 hr | 2 | 607 to 753  | none |
| YJL9147 | YJL9293 | 3 hr | 2 | 650 to 753  | none |
| YJL9142 | YJL9289 | 3 hr | 2 | 576 to 713  | none |

\* - aCGH suggests possible spontaneous diploid or mixed population. This is indicated either by the points in amplified region scattering at a non-quantile value (ie. 1.5) or by the points of an aneuploid chromosome scattering at a non-quantile value. aCGH will not be able to suggest possibly diploidization in cases of amplicons with quantile values or where there are no aneuploidies.

† - We suspect these isolates are diploids in which one copy of Chromosome IV bears an amplification

‡ - We suspect these isolates are diploids in which both copies of Chromosome IV bear an amplification
