# Supplementary material for: Single-Stranded Annealing Induced by Re-Initiation of Replication Origins Provides a Novel and Efficient Mechanism for Generating Copy Number Expansion via Non-Allelic Homologous Recombination
Source: PubMed Central journal article supplement (PMC3536649; doi:10.1371/journal.pgen.1003192), 2013-01-03
Supplement: pgen.1003192.s012.pdf [file pgen.1003192.s012.pdf]

**Table S5**

Yeast strains used in this study.

| Strain  | Genotype                                                                                                                                                                                                                         | Source                    |
|---------|----------------------------------------------------------------------------------------------------------------------------------------------------------------------------------------------------------------------------------|---------------------------|
| YJL6558 | <i>MATa MCM7-2NLS ura3-52::pGAL-ΔntCDC6,cdk2A, URA3} ORC2 orc6(S116A) leu2 trp1-289 ade2 ade3 bar1::LEU2 ChrIV<sub>567kb</sub>::{kanMX, ade3-2p, ARS317} ars317::natMX</i>                                                       | Green et al. <sup>1</sup> |
| YJL6974 | <i>MATa MCM7-2NLS ura3-52::pGAL, URA3} ORC2 orc6(S116A) leu2 trp1-289 ade2 ade3 bar1::LEU2 ChrIV<sub>567kb</sub>::{kanMX, ade3-2p, ARS317} ars317::natMX</i>                                                                     | Green et al. <sup>1</sup> |
| YJL7445 | <i>MATa rad1::TRP1 MCM7-2NLS ura3-52::pGAL-ΔntCDC6,cdk2A, URA3} ORC2 orc6(S116A) leu2 trp1-289 ade2 ade3 bar1::LEU2 ChrIV<sub>567kb</sub>::{kanMX, ade3-2p, ARS317} ars317::natMX</i>                                            | This Study                |
| YJL7451 | <i>MATa rad51::TRP1 MCM7-2NLS ura3-52::pGAL-ΔntCDC6,cdk2A, URA3} ORC2 orc6(S116A) leu2 trp1-289 ade2 ade3 bar1::LEU2 ChrIV<sub>567kb</sub>::{kanMX, ade3-2p, ARS317} ars317::natMX</i>                                           | This Study                |
| YJL7607 | <i>MATa MCM7-2NLS ura3-52 ORC2 orc6(S116A) leu2 trp1-289 ade2 ade3 bar1::LEU2 ChrIV<sub>567kb</sub>::{kanMX, ade3-2p, ARS317} ars317::natMX</i>                                                                                  | This Study                |
| YJL7852 | <i>MATa MCM7-2NLS ura3-52::pGAL-ΔntCDC6,cdk2A, URA3} ORC2 orc6(S116A) leu2 trp1-289 ade2 ade3 bar1::LEU2 ChrIV<sub>567kb</sub>::{kanMX, ade3-2p, ARS317} ars317::natMX</i>                                                       | This Study                |
| YJL7906 | <i>MATa MCM7-2NLS ura3-ΔORF ORC2 orc6(S116A) leu2 trp1-289 ade2 ade3 bar1::LEU2 ChrIV<sub>567kb</sub>::{kanMX, ade3-2p, ARS317} ars317::natMX</i>                                                                                | This Study                |
| YJL7929 | <i>MATa MCM7-2NLS ura3-ΔORF ORC2 orc6(S116A) leu2 trp1-289 ade2 ade3 bar1::LEU2 ChrIV<sub>567kb</sub>::{kanMX, ade3-2p, ARS317} ars317::natMX YDRCTy2-1::pGAL-YDRCTy2-1 5' homology - RA3 - YDRCTy2-1 3' homology(v1), URA3}</i> | This Study                |
| YJL7931 | <i>MATa MCM7-2NLS ura3-ΔORF ORC2 orc6(S116A) leu2 trp1-289 ade2 ade3 bar1::LEU2 ChrIV<sub>567kb</sub>::{kanMX, ade3-2p, ARS317} ars317::natMX YDRCTy1-1::pGAL-YDRCTy1-1 5' homology(v1) - UR - YDRCTy1-1 3' homology, URA3}</i>  | This Study                |
| YJL7954 | <i>MATa MCM7-2NLS ura3-ΔORF ORC2 orc6(S116A) leu2 trp1-289 ade2 ade3 bar1::LEU2 ChrIV<sub>567kb</sub>::{kanMX, ade3-2p, ARS317} ars317::natMX &lt;YDRCDelta2, YDRCDelta3, YDRCDelta4, YDRCTy2-1, YDRCDelta5&gt;Δ::RA3(v1)</i>    | This Study                |

**Table S5 (continued)**

Yeast strains used in this study.

|                  |                                                                                                                                                                                                                                                                                                                                       |            |
|------------------|---------------------------------------------------------------------------------------------------------------------------------------------------------------------------------------------------------------------------------------------------------------------------------------------------------------------------------------|------------|
| YJL7964          | <i>MATa MCM7-2NLS ura3-ΔORF ORC2 orc6(S116A) leu2 trp1-289 ade2 ade3 bar1::LEU2 ChrIV567kb::{kanMX, ade3-2p, ARS317} ars317::natMX &lt;YDRCdelta7, YDRCTy1-1, YDRCdelta8, YDRCsigma1, YDRCdelta9&gt;Δ::UR(v1)</i>                                                                                                                     | This Study |
| YJL7986          | <i>MATa MCM7-2NLS ura3-ΔORF ORC2 orc6(S116A) leu2 trp1-289 ade2 ade3 bar1::LEU2 ChrIV567kb::{kanMX, ade3-2p, ARS317} ars317::natMX &lt;YDRCdelta2, YDRCdelta3, YDRCdelta4, YDRCTy2-1, YDRCdelta5&gt;Δ::RA3(v1) YDRCTy1-1::{YDRCTy1-1 5' homology(v1) - UR - YDRCTy1-1 3' homology, URA3}</i>                                          | This Study |
| YJL7993          | <i>MATa MCM7-2NLS ura3-ΔORF ORC2 orc6(S116A) leu2 trp1-289 ade2 ade3 bar1::LEU2 ChrIV567kb::{kanMX, ade3-2p, ARS317} ars317::natMX &lt;YDRCdelta2, YDRCdelta3, YDRCdelta4, YDRCTy2-1, YDRCdelta5&gt;Δ::RA3(v1) YDRCdelta7, YDRCTy1-1, YDRCdelta8, YDRCsigma1, YDRCdelta9&gt;Δ::UR(v1)</i>                                             | This Study |
| YJL8027          | <i>MATa MCM7-2NLS ura3- ΔORF::{tACT1-pGAL1/10-Δ ntCDC6,cdk2A-tCDC6, URA3} ORC2 orc6(S116A) leu2 trp1-289 ade2 ade3 bar1::LEU2 ChrIV<sub>567kb</sub>::{kanMX, ade3-2p, ARS317} ars317::natMX</i>                                                                                                                                       | This Study |
| YJL8031          | <i>MATa MCM7-2NLS ura3-ΔORF::{tACT1-pGAL1/10-ΔntCDC6,cdk2A-tCDC6, URA3} ORC2 orc6(S116A) leu2 trp1-289 ade2 ade3 bar1::LEU2 ChrIV567kb::{kanMX, ade3-2p, ARS317} ars317::natMX &lt;YDRCdelta2, YDRCdelta3, YDRCdelta4, YDRCTy2-1, YDRCdelta5&gt;Δ::RA3(v1)</i>                                                                        | This Study |
| YJL8035          | <i>MATa MCM7-2NLS ura3-ΔORF::{tACT1-pGAL1/10-ΔntCDC6,cdk2A-tCDC6, URA3} ORC2 orc6(S116A) leu2 trp1-289 ade2 ade3 bar1::LEU2 ChrIV567kb::{kanMX, ade3-2p, ARS317} ars317::natMX &lt;YDRCdelta7, YDRCTy1-1, YDRCdelta8, YDRCsigma1, YDRCdelta9&gt;Δ::UR(v1)</i>                                                                         | This Study |
| YJL8040          | <i>MATa MCM7-2NLS ura3-ΔORF::{tACT1-pGAL1/10-ΔntCDC6,cdk2A-tCDC6, URA3} ORC2 orc6(S116A) leu2 trp1-289 ade2 ade3 bar1::LEU2 ChrIV567kb::{kanMX, ade3-2p, ARS317} ars317::natMX &lt;YDRCdelta2, YDRCdelta3, YDRCdelta4, YDRCTy2-1, YDRCdelta5&gt;Δ::RA3(v1) YDRCdelta7, YDRCTy1-1, YDRCdelta8, YDRCsigma1, YDRCdelta9&gt;Δ::UR(v1)</i> | This Study |
| YJL8100/8<br>101 | <i>MATa MCM7-2NLS ura3 ::tACT1-pGAL1/10-Δ ntCDC6,cdk2A-tCDC6 ORC2 orc6(S116A) leu2 trp1-289 ade2 ade3 bar1::LEU2 ChrIV<sub>567kb</sub>::{kanMX, ade3-2p, ARS317} ars317::natMX</i>                                                                                                                                                    | This Study |
| YJL8104          | <i>MATa MCM7-2NLS ura3::tACT1-pGAL1/10-ΔntCDC6,cdk2A-tCDC6 ORC2 orc6(S116A) leu2 trp1-289 ade2 ade3 bar1::LEU2 ChrIV567kb::{kanMX, ade3-2p, ARS317} ars317::natMX &lt;YDRCdelta2, YDRCdelta3, YDRCdelta4, YDRCTy2-1, YDRCdelta5&gt;Δ::RA3(v1)</i>                                                                                     | This Study |

**Table S5 (continued)**

Yeast strains used in this study.

|              |                                                                                                                                                                                                                                                                                                                                                                     |            |
|--------------|---------------------------------------------------------------------------------------------------------------------------------------------------------------------------------------------------------------------------------------------------------------------------------------------------------------------------------------------------------------------|------------|
| YJL8108      | <i>MATa MCM7-2NLS ura3::tACT1-pGAL1/10-ΔntCDC6,cdk2A-tCDC6 ORC2 orc6(S116A) leu2 trp1-289 ade2 ade3 bar1::LEU2 ChrIV567kb::{kanMX, ade3-2p, ARS317} ars317::natMX &lt;YDRCdelta7, YDRCTy1-1, YDRCdelta8, YDRCsigma1, YDRCdelta9&gt;Δ::UR(v1)</i>                                                                                                                    | This Study |
| YJL8112/8113 | <i>MATa MCM7-2NLS ura3::tACT1-pGAL1/10-ΔntCDC6,cdk2A-tCDC6 ORC2 orc6(S116A) leu2 trp1-289 ade2 ade3 bar1::LEU2 ChrIV567kb::{kanMX, ade3-2p, ARS317} ars317::natMX &lt;YDRCdelta2, YDRCdelta3, YDRCdelta4, YDRCTy2-1, YDRCdelta5&gt;Δ::RA3(v1) YDRCdelta7, YDRCTy1-1, YDRCdelta8, YDRCsigma1, YDRCdelta9&gt;Δ::UR(v1)</i>                                            | This Study |
| YJL8230      | <i>MATa MCM7-2NLS ura3-ΔORF ORC2 orc6(S116A) leu2 trp1-289 ade2 ade3 bar1::LEU2 ChrIV567kb::{kanMX, ade3-2p, ARS317} ars317::natMX YDRCTy2-1::{YDRCTy2-1 5' homology - RA3 - YDRCTy2-1 3' homology(v2), URA3}</i>                                                                                                                                                   | This Study |
| YJL8259      | <i>MATa MCM7-2NLS ura3-ΔORF ORC2 orc6(S116A) leu2 trp1-289 ade2 ade3 bar1::LEU2 ChrIV567kb::{kanMX, ade3-2p, ARS317} ars317::natMX &lt;YDRCdelta2, YDRCdelta3, YDRCdelta4, YDRCTy2-1, YDRCdelta5, tL(UAA)D, YDRCdelta6a, YDRCdelta7, YDRW034C-A, YDRCdelta6b, tQ(UUG)D1&gt;Δ::RA3(v2)</i>                                                                           | This Study |
| YJL8261      | <i>MATa MCM7-2NLS ura3-ΔORF ORC2 orc6(S116A) leu2 trp1-289 ade2 ade3 bar1::LEU2 ChrIV567kb::{kanMX, ade3-2p, ARS317} ars317::natMX YDRCTy1-1::{YDRCTy1-1 5' homology(v2) - UR - YDRCTy1-1 3' homology, URA3}</i>                                                                                                                                                    | This Study |
| YJL8264      | <i>MATa MCM7-2NLS ura3-ΔORF ORC2 orc6(S116A) leu2 trp1-289 ade2 ade3 bar1::LEU2 ChrIV567kb::{kanMX, ade3-2p, ARS317} ars317::natMX &lt;YDRCdelta2, YDRCdelta3, YDRCdelta4, YDRCTy2-1, YDRCdelta5, tL(UAA)D, YDRCdelta6a, YDRCdelta7, YDRW034C-A, YDRCdelta6b, tQ(UUG)D1&gt;Δ::RA3(v2) YDRCTy1-1::{YDRCTy1-1 5' homology(v2) - UR - YDRCTy1-1 3' homology, URA3}</i> | This Study |
| YJL8271      | <i>MATa MCM7-2NLS ura3-ΔORF ORC2 orc6(S116A) leu2 trp1-289 ade2 ade3 bar1::LEU2 ChrIV567kb::{kanMX, ade3-2p, ARS317} ars317::natMX &lt;tQ(UUG)D2, YDRCdelta7, YDRCTy1-1, YDRCdelta8, YDRCsigma1, YDRCdelta9&gt;Δ::UR(v2)</i>                                                                                                                                        | This Study |

**Table S5 (continued)**

Yeast strains used in this study.

|              |                                                                                                                                                                                                                                                                                                                                                                                                                |            |
|--------------|----------------------------------------------------------------------------------------------------------------------------------------------------------------------------------------------------------------------------------------------------------------------------------------------------------------------------------------------------------------------------------------------------------------|------------|
| YJL8274      | <i>MATa MCM7-2NLS ura3-ΔORF ORC2 orc6(S116A) leu2 trp1-289 ade2 ade3 bar1::LEU2 ChrIV567kb::{kanMX, ade3-2p, ARS317} ars317::natMX &lt;YDRCdelta2, YDRCdelta3, YDRCdelta4, YDRCTy2-1, YDRCdelta5, tL(UAA)D, YDRCdelta6a, YDRCdelta7, YDRW034C-A, YDRCdelta6b, tQ(UUG)D1&gt;Δ::RA3(v2) &lt;tQ(UUG)D2, YDRCdelta7, YDRCTy1-1, YDRCdelta8, YDRCsigma1, YDRCdelta9&gt;Δ::UR(v2)</i>                                | This Study |
| YJL8340      | <i>MATa MCM7-2NLS URA3 ORC2 orc6(S116A) leu2 trp1-289 ade2 ade3 bar1::LEU2 ChrIV567kb::{kanMX, ade3-2p, ARS317} ars317::natMX &lt;YDRCdelta2, YDRCdelta3, YDRCdelta4, YDRCTy2-1, YDRCdelta5, tL(UAA)D, YDRCdelta6a, YDRCdelta7, YDRW034C-A, YDRCdelta6b, tQ(UUG)D1&gt;Δ::RA3(v2)</i>                                                                                                                           | This Study |
| YJL8342      | <i>MATa MCM7-2NLS URA3 ORC2 orc6(S116A) leu2 trp1-289 ade2 ade3 bar1::LEU2 ChrIV567kb::{kanMX, ade3-2p, ARS317} ars317::natMX &lt;tQ(UUG)D2, YDRCdelta7, YDRCTy1-1, YDRCdelta8, YDRCsigma1, YDRCdelta9&gt;Δ::UR(v2)</i>                                                                                                                                                                                        | This Study |
| YJL8344      | <i>MATa MCM7-2NLS URA3 ORC2 orc6(S116A) leu2 trp1-289 ade2 ade3 bar1::LEU2 ChrIV567kb::{kanMX, ade3-2p, ARS317} ars317::natMX &lt;YDRCdelta2, YDRCdelta3, YDRCdelta4, YDRCTy2-1, YDRCdelta5, tL(UAA)D, YDRCdelta6a, YDRCdelta7, YDRW034C-A, YDRCdelta6b, tQ(UUG)D1&gt;Δ::RA3(v2) &lt;tQ(UUG)D2, YDRCdelta7, YDRCTy1-1, YDRCdelta8, YDRCsigma1, YDRCdelta9&gt;Δ::UR(v2)</i>                                     | This Study |
| YJL8355      | <i>MATa MCM7-2NLS ura3::tACT1-pGAL1/10-ΔntCDC6,cdk2A-tCDC6 ORC2 orc6(S116A) leu2 trp1-289 ade2 ade3 bar1::LEU2 ChrIV567kb::{kanMX, ade3-2p, ARS317} ars317::natMX &lt;YDRCdelta2, YDRCdelta3, YDRCdelta4, YDRCTy2-1, YDRCdelta5, tL(UAA)D, YDRCdelta6a, YDRCdelta7, YDRW034C-A, YDRCdelta6b, tQ(UUG)D1&gt;Δ::RA3(v2)</i>                                                                                       | This Study |
| YJL8359      | <i>MATa MCM7-2NLS ura3::tACT1-pGAL1/10-ΔntCDC6,cdk2A-tCDC6 ORC2 orc6(S116A) leu2 trp1-289 ade2 ade3 bar1::LEU2 ChrIV567kb::{kanMX, ade3-2p, ARS317} ars317::natMX &lt;tQ(UUG)D2, YDRCdelta7, YDRCTy1-1, YDRCdelta8, YDRCsigma1, YDRCdelta9&gt;Δ::UR(v2)</i>                                                                                                                                                    | This Study |
| YJL8363/8364 | <i>MATa MCM7-2NLS ura3::tACT1-pGAL1/10-ΔntCDC6,cdk2A-tCDC6 ORC2 orc6(S116A) leu2 trp1-289 ade2 ade3 bar1::LEU2 ChrIV567kb::{kanMX, ade3-2p, ARS317} ars317::natMX &lt;YDRCdelta2, YDRCdelta3, YDRCdelta4, YDRCTy2-1, YDRCdelta5, tL(UAA)D, YDRCdelta6a, YDRCdelta7, YDRW034C-A, YDRCdelta6b, tQ(UUG)D1&gt;Δ::RA3(v2) &lt;tQ(UUG)D2, YDRCdelta7, YDRCTy1-1, YDRCdelta8, YDRCsigma1, YDRCdelta9&gt;Δ::UR(v2)</i> | This Study |

**Table S5 (continued)**

Yeast strains used in this study.

|                  |                                                                                                                                                                                                                                                                                                                                                                                                                            |            |
|------------------|----------------------------------------------------------------------------------------------------------------------------------------------------------------------------------------------------------------------------------------------------------------------------------------------------------------------------------------------------------------------------------------------------------------------------|------------|
| YJL8407/8<br>408 | <i>MATa dni4::TRP1 MCM7-2NLS ura3::tACT1-pGAL1/10-ΔntCDC6,cdk2A-tCDC6 ORC2 orc6(S116A) leu2 trp1-289 ade2 ade3 bar1::LEU2 ChrIV567kb::{kanMX, ade3-2p, ARS317} ars317::natMX &lt;YDRCdelta2, YDRCdelta3, YDRCdelta4, YDRCTy2-1, YDRCdelta5, tL(UAA)D, YDRCdelta6a, YDRCdelta7, YDRW034C-A, YDRCdelta6b, tQ(UUG)D1&gt;Δ::RA3(v2) &lt;tQ(UUG)D2, YDRCdelta7, YDRCTy1-1, YDRCdelta8, YDRCsigma1, YDRCdelta9&gt;Δ::UR(v2)</i>  | This Study |
| YJL8409/8<br>410 | <i>MATa rad52::TRP1 MCM7-2NLS ura3::tACT1-pGAL1/10-ΔntCDC6,cdk2A-tCDC6 ORC2 orc6(S116A) leu2 trp1-289 ade2 ade3 bar1::LEU2 ChrIV567kb::{kanMX, ade3-2p, ARS317} ars317::natMX &lt;YDRCdelta2, YDRCdelta3, YDRCdelta4, YDRCTy2-1, YDRCdelta5, tL(UAA)D, YDRCdelta6a, YDRCdelta7, YDRW034C-A, YDRCdelta6b, tQ(UUG)D1&gt;Δ::RA3(v2) &lt;tQ(UUG)D2, YDRCdelta7, YDRCTy1-1, YDRCdelta8, YDRCsigma1, YDRCdelta9&gt;Δ::UR(v2)</i> | This Study |
| YJL8412/8<br>413 | <i>MATa rad51::TRP1 MCM7-2NLS ura3::tACT1-pGAL1/10-ΔntCDC6,cdk2A-tCDC6 ORC2 orc6(S116A) leu2 trp1-289 ade2 ade3 bar1::LEU2 ChrIV567kb::{kanMX, ade3-2p, ARS317} ars317::natMX &lt;YDRCdelta2, YDRCdelta3, YDRCdelta4, YDRCTy2-1, YDRCdelta5, tL(UAA)D, YDRCdelta6a, YDRCdelta7, YDRW034C-A, YDRCdelta6b, tQ(UUG)D1&gt;Δ::RA3(v2) &lt;tQ(UUG)D2, YDRCdelta7, YDRCTy1-1, YDRCdelta8, YDRCsigma1, YDRCdelta9&gt;Δ::UR(v2)</i> | This Study |
| YJL8415/8<br>416 | <i>MATa rad1::TRP1 MCM7-2NLS ura3::tACT1-pGAL1/10-ΔntCDC6,cdk2A-tCDC6 ORC2 orc6(S116A) leu2 trp1-289 ade2 ade3 bar1::LEU2 ChrIV567kb::{kanMX, ade3-2p, ARS317} ars317::natMX &lt;YDRCdelta2, YDRCdelta3, YDRCdelta4, YDRCTy2-1, YDRCdelta5, tL(UAA)D, YDRCdelta6a, YDRCdelta7, YDRW034C-A, YDRCdelta6b, tQ(UUG)D1&gt;Δ::RA3(v2) &lt;tQ(UUG)D2, YDRCdelta7, YDRCTy1-1, YDRCdelta8, YDRCsigma1, YDRCdelta9&gt;Δ::UR(v2)</i>  | This Study |
| YJL8418/8<br>419 | <i>MATa msh3::TRP1 MCM7-2NLS ura3::tACT1-pGAL1/10-ΔntCDC6,cdk2A-tCDC6 ORC2 orc6(S116A) leu2 trp1-289 ade2 ade3 bar1::LEU2 ChrIV567kb::{kanMX, ade3-2p, ARS317} ars317::natMX &lt;YDRCdelta2, YDRCdelta3, YDRCdelta4, YDRCTy2-1, YDRCdelta5, tL(UAA)D, YDRCdelta6a, YDRCdelta7, YDRW034C-A, YDRCdelta6b, tQ(UUG)D1&gt;Δ::RA3(v2) &lt;tQ(UUG)D2, YDRCdelta7, YDRCTy1-1, YDRCdelta8, YDRCsigma1, YDRCdelta9&gt;Δ::UR(v2)</i>  | This Study |
| YJL8421/8<br>422 | <i>MATa pol32::TRP1 MCM7-2NLS ura3::tACT1-pGAL1/10-ΔntCDC6,cdk2A-tCDC6 ORC2 orc6(S116A) leu2 trp1-289 ade2 ade3 bar1::LEU2 ChrIV567kb::{kanMX, ade3-2p, ARS317} ars317::natMX &lt;YDRCdelta2, YDRCdelta3, YDRCdelta4, YDRCTy2-1, YDRCdelta5, tL(UAA)D, YDRCdelta6a, YDRCdelta7, YDRW034C-A, YDRCdelta6b, tQ(UUG)D1&gt;Δ::RA3(v2) &lt;tQ(UUG)D2, YDRCdelta7, YDRCTy1-1, YDRCdelta8, YDRCsigma1, YDRCdelta9&gt;Δ::UR(v2)</i> | This Study |

**Table S5 (continued)**

Yeast strains used in this study.

|                  |                                                                                                                                                                                                                                                                                                                                                                                                                                                |            |
|------------------|------------------------------------------------------------------------------------------------------------------------------------------------------------------------------------------------------------------------------------------------------------------------------------------------------------------------------------------------------------------------------------------------------------------------------------------------|------------|
| YJL8425/8<br>426 | <i>MATa MCM7-2NLS ura3-52::pGAL-ΔntCDC6-cdk2A, URA3} ORC2 orc6(S116A) leu2 trp1-289 ade2 ade3 bar1::LEU2 ChrIV<sub>567kb</sub>::{hphMX, I-SceI cut site, ade3-2p, ARS317} ars317::natMX</i>                                                                                                                                                                                                                                                    | This Study |
| YJL8427/8<br>428 | <i>MATa MCM7-2NLS ura3-52::pGAL, URA3} ORC2 orc6(S116A) leu2 trp1-289 ade2 ade3 bar1::LEU2 ChrIV<sub>567kb</sub>::{hphMX, I-SceI cut site, ade3-2p, ARS317} ars317::natMX</i>                                                                                                                                                                                                                                                                  | This Study |
| YJL8799          | <i>MATa MCM7-2NLS ura3::tACT1-pGAL1/10-Δ ntCDC6,cdk2A-tCDC6 ORC2 orc6(S116A) leu2 trp1-289 ade2 ade3 bar1::LEU2 ChrIV<sub>567kb</sub>::{kanMX, ade3-2p, ARS317} ars317::natMX YDRCTy2-1::YDRCTy2-1 5' homology-YDRCTy2-1 3' homology(v2), URA3}</i>                                                                                                                                                                                            | This Study |
| YJL8807          | <i>MATa MCM7-2NLS ura3::tACT1-pGAL1/10-ΔntCDC6,cdk2A-tCDC6 ORC2 orc6(S116A) leu2 trp1-289 ade2 ade3 bar1::LEU2 ChrIV<sub>567kb</sub>::{kanMX, ade3-2p, ARS317} ars317::natMX &lt;YDRCdelta2, YDRCdelta3, YDRCdelta4, YDRCTy2-1, YDRCdelta5, tL(UAA)D, YDRCdelta6a, YDRCdelta7, YDRW034C-A, YDRCdelta6b, tQ(UUG)D1&gt; Δ</i>                                                                                                                    | This Study |
| YJL8824          | <i>MATa MCM7-2NLS ura3::tACT1-pGAL1/10-ΔntCDC6,cdk2A-tCDC6 ORC2 orc6(S116A) leu2 trp1-289 ade2 ade3 bar1::LEU2 ChrIV<sub>567kb</sub>::{kanMX, ade3-2p, ARS317} ars317::natMX &lt;YDRCdelta2, YDRCdelta3, YDRCdelta4, YDRCTy2-1, YDRCdelta5, tL(UAA)D, YDRCdelta6a, YDRCdelta7, YDRW034C-A, YDRCdelta6b, tQ(UUG)D1&gt; Δ YDRCTy1-1::YDRCTy1-1 5' homology(v2)-YDRCTy1-1 3' homology, URA3}</i>                                                  | This Study |
| YJL8842          | <i>MATa MCM7-2NLS ura3::tACT1-pGAL1/10-ΔntCDC6,cdk2A-tCDC6 ORC2 orc6(S116A) leu2 trp1-289 ade2 ade3 bar1::LEU2 ChrIV<sub>567kb</sub>::{kanMX, ade3-2p, ARS317} ars317::natMX &lt;YDRCdelta2, YDRCdelta3, YDRCdelta4, YDRCTy2-1, YDRCdelta5, tL(UAA)D, YDRCdelta6a, YDRCdelta7, YDRW034C-A, YDRCdelta6b, tQ(UUG)D1&gt; Δ &lt;tQ(UUG)D2, YDRCdelta7, YDRCTy1-1, YDRCdelta8, YDRCsigma1, YDRCdelta9&gt; Δ</i>                                     | This Study |
| YJL9054          | <i>MATa MCM7-2NLS ura3::tACT1-pGAL1/10-ΔntCDC6,cdk2A-tCDC6 ORC2 orc6(S116A) leu2 trp1-289 ade2 ade3 bar1::LEU2 ChrIV<sub>567kb</sub>::{kanMX, ade3-2p, ARS317} ars317::natMX &lt;YDRCdelta2, YDRCdelta3, YDRCdelta4, YDRCTy2-1, YDRCdelta5, tL(UAA)D, YDRCdelta6a, YDRCdelta7, YDRW034C-A, YDRCdelta6b, tQ(UUG)D1&gt; Δ &lt;tQ(UUG)D2, YDRCdelta7, YDRCTy1-1, YDRCdelta8, YDRCsigma1, YDRCdelta9&gt; Δ ChrIV<sub>515kb</sub>::{hphMX, RA3}</i> | This Study |

**Table S5 (continued)**

Yeast strains used in this study.

|                  |                                                                                                                                                                                                                                                                                                                                                                                                                                               |            |
|------------------|-----------------------------------------------------------------------------------------------------------------------------------------------------------------------------------------------------------------------------------------------------------------------------------------------------------------------------------------------------------------------------------------------------------------------------------------------|------------|
| YJL9056          | <i>MATa MCM7-2NLS ura3::tACT1-pGAL1/10-ΔntCDC6,cdk2A-tCDC6 ORC2 orc6(S116A) leu2 trp1-289 ade2 ade3 bar1::LEU2 ChrIV567kb::{kanMX, ade3-2p, ARS317} ars317::natMX &lt;YDRCdelta2, YDRCdelta3, YDRCdelta4, YDRCTy2-1, YDRCdelta5, tL(UAA)D, YDRCdelta6a, YDRCdelta7, YDRW034C-A, YDRCdelta6b, tQ(UUG)D1&gt;Δ &lt;tQ(UUG)D2, YDRCdelta7, YDRCTy1-1, YDRCdelta8, YDRCsigma1, YDRCdelta9&gt;Δ ChrIV545kb::{hphMX, RA3}</i>                        | This Study |
| YJL9057          | <i>MATa MCM7-2NLS ura3::tACT1-pGAL1/10-ΔntCDC6,cdk2A-tCDC6 ORC2 orc6(S116A) leu2 trp1-289 ade2 ade3 bar1::LEU2 ChrIV567kb::{kanMX, ade3-2p, ARS317} ars317::natMX &lt;YDRCdelta2, YDRCdelta3, YDRCdelta4, YDRCTy2-1, YDRCdelta5, tL(UAA)D, YDRCdelta6a, YDRCdelta7, YDRW034C-A, YDRCdelta6b, tQ(UUG)D1&gt;Δ &lt;tQ(UUG)D2, YDRCdelta7, YDRCTy1-1, YDRCdelta8, YDRCsigma1, YDRCdelta9&gt;Δ ChrIV565kb::{hphMX, RA3}</i>                        | This Study |
| YJL9060          | <i>MATa MCM7-2NLS ura3::tACT1-pGAL1/10-ΔntCDC6,cdk2A-tCDC6 ORC2 orc6(S116A) leu2 trp1-289 ade2 ade3 bar1::LEU2 ChrIV567kb::{kanMX, ade3-2p, ARS317} ars317::natMX &lt;YDRCdelta2, YDRCdelta3, YDRCdelta4, YDRCTy2-1, YDRCdelta5, tL(UAA)D, YDRCdelta6a, YDRCdelta7, YDRW034C-A, YDRCdelta6b, tQ(UUG)D1&gt;Δ &lt;tQ(UUG)D2, YDRCdelta7, YDRCTy1-1, YDRCdelta8, YDRCsigma1, YDRCdelta9&gt;Δ ChrIV576kb::{hphMX, RA3}</i>                        | This Study |
| YJL9062          | <i>MATa MCM7-2NLS ura3::tACT1-pGAL1/10-ΔntCDC6,cdk2A-tCDC6 ORC2 orc6(S116A) leu2 trp1-289 ade2 ade3 bar1::LEU2 ChrIV567kb::{kanMX, ade3-2p, ARS317} ars317::natMX &lt;YDRCdelta2, YDRCdelta3, YDRCdelta4, YDRCTy2-1, YDRCdelta5, tL(UAA)D, YDRCdelta6a, YDRCdelta7, YDRW034C-A, YDRCdelta6b, tQ(UUG)D1&gt;Δ &lt;tQ(UUG)D2, YDRCdelta7, YDRCTy1-1, YDRCdelta8, YDRCsigma1, YDRCdelta9&gt;Δ ChrIV607kb::{hphMX, RA3}</i>                        | This Study |
| YJL9067          | <i>MATa MCM7-2NLS ura3::tACT1-pGAL1/10-ΔntCDC6,cdk2A-tCDC6 ORC2 orc6(S116A) leu2 trp1-289 ade2 ade3 bar1::LEU2 ChrIV567kb::{kanMX, ade3-2p, ARS317} ars317::natMX &lt;YDRCdelta2, YDRCdelta3, YDRCdelta4, YDRCTy2-1, YDRCdelta5, tL(UAA)D, YDRCdelta6a, YDRCdelta7, YDRW034C-A, YDRCdelta6b, tQ(UUG)D1&gt;Δ &lt;tQ(UUG)D2, YDRCdelta7, YDRCTy1-1, YDRCdelta8, YDRCsigma1, YDRCdelta9&gt;Δ ChrIV650kb::{hphMX, RA3}</i>                        | This Study |
| YJL9115/9<br>116 | <i>MATa MCM7-2NLS ura3::tACT1-pGAL1/10-ΔntCDC6,cdk2A-tCDC6 ORC2 orc6(S116A) leu2 trp1-289 ade2 ade3 bar1::LEU2 ChrIV567kb::{kanMX, ade3-2p, ARS317} ars317::natMX &lt;YDRCdelta2, YDRCdelta3, YDRCdelta4, YDRCTy2-1, YDRCdelta5, tL(UAA)D, YDRCdelta6a, YDRCdelta7, YDRW034C-A, YDRCdelta6b, tQ(UUG)D1&gt;Δ &lt;tQ(UUG)D2, YDRCdelta7, YDRCTy1-1, YDRCdelta8, YDRCsigma1, YDRCdelta9&gt;Δ ChrIV515kb::{hphMX, RA3} ChrIV607kb::{UR, TRP1}</i> | This Study |

**Table S5 (continued)**

Yeast strains used in this study.

|                  |                                                                                                                                                                                                                                                                                                                                                                                                                                                |            |
|------------------|------------------------------------------------------------------------------------------------------------------------------------------------------------------------------------------------------------------------------------------------------------------------------------------------------------------------------------------------------------------------------------------------------------------------------------------------|------------|
| YJL9118/9<br>119 | MATa MCM7-2NLS <i>ura3::tACT1-pGAL1/10-ΔntCDC6,cdk2A-tCDC6 ORC2 orc6(S116A) leu2 trp1-289 ade2 ade3 bar1::LEU2 ChrIV567kb::{kanMX, ade3-2p, ARS317} ars317::natMX &lt;YDRCdelta2, YDRCdelta3, YDRCdelta4, YDRCTy2-1, YDRCdelta5, tL(UAA)D, YDRCdelta6a, YDRCdelta7, YDRW034C-A, YDRCdelta6b, tQ(UUG)D1&gt;Δ &lt;tQ(UUG)D2, YDRCdelta7, YDRCTy1-1, YDRCdelta8, YDRCsigma1, YDRCdelta9&gt;Δ ChrIV515kb::{hphMX, RA3} ChrIV650kb::{UR, TRP1}</i>  | This Study |
| YJL9121/9<br>122 | MATa MCM7-2NLS <i>ura3::tACT1-pGAL1/10-ΔntCDC6,cdk2A-tCDC6 ORC2 orc6(S116A) leu2 trp1-289 ade2 ade3 bar1::LEU2 ChrIV567kb::{kanMX, ade3-2p, ARS317} ars317::natMX &lt;YDRCdelta2, YDRCdelta3, YDRCdelta4, YDRCTy2-1, YDRCdelta5, tL(UAA)D, YDRCdelta6a, YDRCdelta7, YDRW034C-A, YDRCdelta6b, tQ(UUG)D1&gt;Δ &lt;tQ(UUG)D2, YDRCdelta7, YDRCTy1-1, YDRCdelta8, YDRCsigma1, YDRCdelta9&gt;Δ ChrIV515kb::{hphMX, RA3} ChrIV753kb::{UR, TRP1}</i>  | This Study |
| YJL9127/9<br>128 | MATa MCM7-2NLS <i>ura3::tACT1-pGAL1/10-ΔntCDC6,cdk2A-tCDC6 ORC2 orc6(S116A) leu2 trp1-289 ade2 ade3 bar1::LEU2 ChrIV567kb::{kanMX, ade3-2p, ARS317} ars317::natMX &lt;YDRCdelta2, YDRCdelta3, YDRCdelta4, YDRCTy2-1, YDRCdelta5, tL(UAA)D, YDRCdelta6a, YDRCdelta7, YDRW034C-A, YDRCdelta6b, tQ(UUG)D1&gt;Δ &lt;tQ(UUG)D2, YDRCdelta7, YDRCTy1-1, YDRCdelta8, YDRCsigma1, YDRCdelta9&gt;Δ ChrIV515kb::{hphMX, RA3} ChrIV875kb::{UR, TRP1}</i>  | This Study |
| YJL9130/9<br>131 | MATa MCM7-2NLS <i>ura3::tACT1-pGAL1/10-ΔntCDC6,cdk2A-tCDC6 ORC2 orc6(S116A) leu2 trp1-289 ade2 ade3 bar1::LEU2 ChrIV567kb::{kanMX, ade3-2p, ARS317} ars317::natMX &lt;YDRCdelta2, YDRCdelta3, YDRCdelta4, YDRCTy2-1, YDRCdelta5, tL(UAA)D, YDRCdelta6a, YDRCdelta7, YDRW034C-A, YDRCdelta6b, tQ(UUG)D1&gt;Δ &lt;tQ(UUG)D2, YDRCdelta7, YDRCTy1-1, YDRCdelta8, YDRCsigma1, YDRCdelta9&gt;Δ ChrIV515kb::{hphMX, RA3} ChrIV985kb::{UR, TRP1}</i>  | This Study |
| YJL9133/9<br>134 | MATa MCM7-2NLS <i>ura3::tACT1-pGAL1/10-ΔntCDC6,cdk2A-tCDC6 ORC2 orc6(S116A) leu2 trp1-289 ade2 ade3 bar1::LEU2 ChrIV567kb::{kanMX, ade3-2p, ARS317} ars317::natMX &lt;YDRCdelta2, YDRCdelta3, YDRCdelta4, YDRCTy2-1, YDRCdelta5, tL(UAA)D, YDRCdelta6a, YDRCdelta7, YDRW034C-A, YDRCdelta6b, tQ(UUG)D1&gt;Δ &lt;tQ(UUG)D2, YDRCdelta7, YDRCTy1-1, YDRCdelta8, YDRCsigma1, YDRCdelta9&gt;Δ ChrIV515kb::{hphMX, RA3} ChrIV1100kb::{UR, TRP1}</i> | This Study |
| YJL9136/9<br>137 | MATa MCM7-2NLS <i>ura3::tACT1-pGAL1/10-ΔntCDC6,cdk2A-tCDC6 ORC2 orc6(S116A) leu2 trp1-289 ade2 ade3 bar1::LEU2 ChrIV567kb::{kanMX, ade3-2p, ARS317} ars317::natMX &lt;YDRCdelta2, YDRCdelta3, YDRCdelta4, YDRCTy2-1, YDRCdelta5, tL(UAA)D, YDRCdelta6a, YDRCdelta7, YDRW034C-A, YDRCdelta6b, tQ(UUG)D1&gt;Δ &lt;tQ(UUG)D2, YDRCdelta7, YDRCTy1-1, YDRCdelta8, YDRCsigma1, YDRCdelta9&gt;Δ ChrIV545kb::{hphMX, RA3} ChrIV592kb::{UR, TRP1}</i>  | This Study |



**Table S5 (continued)**

Yeast strains used in this study.

|                  |                                                                                                                                                                                                                                                                                                                                                                                                                                               |            |
|------------------|-----------------------------------------------------------------------------------------------------------------------------------------------------------------------------------------------------------------------------------------------------------------------------------------------------------------------------------------------------------------------------------------------------------------------------------------------|------------|
| YJL9139/9<br>140 | <i>MATa MCM7-2NLS ura3::tACT1-pGAL1/10-ΔntCDC6,cdk2A-tCDC6 ORC2 orc6(S116A) leu2 trp1-289 ade2 ade3 bar1::LEU2 ChrIV567kb::{kanMX, ade3-2p, ARS317} ars317::natMX &lt;YDRCdelta2, YDRCdelta3, YDRCdelta4, YDRCTy2-1, YDRCdelta5, tL(UAA)D, YDRCdelta6a, YDRCdelta7, YDRW034C-A, YDRCdelta6b, tQ(UUG)D1&gt;Δ &lt;tQ(UUG)D2, YDRCdelta7, YDRCTy1-1, YDRCdelta8, YDRCsigma1, YDRCdelta9&gt;Δ ChrIV565kb::{hphMX, RA3} ChrIV576kb::{UR, TRP1}</i> | This Study |
| YJL9142/9<br>143 | <i>MATa MCM7-2NLS ura3::tACT1-pGAL1/10-ΔntCDC6,cdk2A-tCDC6 ORC2 orc6(S116A) leu2 trp1-289 ade2 ade3 bar1::LEU2 ChrIV567kb::{kanMX, ade3-2p, ARS317} ars317::natMX &lt;YDRCdelta2, YDRCdelta3, YDRCdelta4, YDRCTy2-1, YDRCdelta5, tL(UAA)D, YDRCdelta6a, YDRCdelta7, YDRW034C-A, YDRCdelta6b, tQ(UUG)D1&gt;Δ &lt;tQ(UUG)D2, YDRCdelta7, YDRCTy1-1, YDRCdelta8, YDRCsigma1, YDRCdelta9&gt;Δ ChrIV576kb::{hphMX, RA3} ChrIV713kb::{UR, TRP1}</i> | This Study |
| YJL9145/9<br>146 | <i>MATa MCM7-2NLS ura3::tACT1-pGAL1/10-ΔntCDC6,cdk2A-tCDC6 ORC2 orc6(S116A) leu2 trp1-289 ade2 ade3 bar1::LEU2 ChrIV567kb::{kanMX, ade3-2p, ARS317} ars317::natMX &lt;YDRCdelta2, YDRCdelta3, YDRCdelta4, YDRCTy2-1, YDRCdelta5, tL(UAA)D, YDRCdelta6a, YDRCdelta7, YDRW034C-A, YDRCdelta6b, tQ(UUG)D1&gt;Δ &lt;tQ(UUG)D2, YDRCdelta7, YDRCTy1-1, YDRCdelta8, YDRCsigma1, YDRCdelta9&gt;Δ ChrIV607kb::{hphMX, RA3} ChrIV753kb::{UR, TRP1}</i> | This Study |
| YJL9147/9<br>148 | <i>MATa MCM7-2NLS ura3::tACT1-pGAL1/10-ΔntCDC6,cdk2A-tCDC6 ORC2 orc6(S116A) leu2 trp1-289 ade2 ade3 bar1::LEU2 ChrIV567kb::{kanMX, ade3-2p, ARS317} ars317::natMX &lt;YDRCdelta2, YDRCdelta3, YDRCdelta4, YDRCTy2-1, YDRCdelta5, tL(UAA)D, YDRCdelta6a, YDRCdelta7, YDRW034C-A, YDRCdelta6b, tQ(UUG)D1&gt;Δ &lt;tQ(UUG)D2, YDRCdelta7, YDRCTy1-1, YDRCdelta8, YDRCsigma1, YDRCdelta9&gt;Δ ChrIV650kb::{hphMX, RA3} ChrIV753kb::{UR, TRP1}</i> | This Study |
| YJL9149-<br>9151 | <i>MATa MCM7-2NLS ura3::tACT1-pGAL1/10-tCDC6 ORC2 orc6(S116A) leu2 trp1-289 ade2 ade3 bar1::LEU2 ChrIV567kb::{kanMX, ade3-2p, ARS317} ars317::natMX &lt;YDRCdelta2, YDRCdelta3, YDRCdelta4, YDRCTy2-1, YDRCdelta5, tL(UAA)D, YDRCdelta6a, YDRCdelta7, YDRW034C-A, YDRCdelta6b, tQ(UUG)D1&gt;Δ::RA3(v2) &lt;tQ(UUG)D2, YDRCdelta7, YDRCTy1-1, YDRCdelta8, YDRCsigma1, YDRCdelta9&gt;Δ::UR(v2)</i>                                              | This Study |

<sup>1</sup> Green, B.M. et al. *Science* **329**, 943–946 (2010)
