# Supplementary material for: Single-Stranded Annealing Induced by Re-Initiation of Replication Origins Provides a Novel and Efficient Mechanism for Generating Copy Number Expansion via Non-Allelic Homologous Recombination
Source: PLOS journal article supplement (doi:10.1371/journal.pgen.1003192), 2013-01-03

**Figure S5**

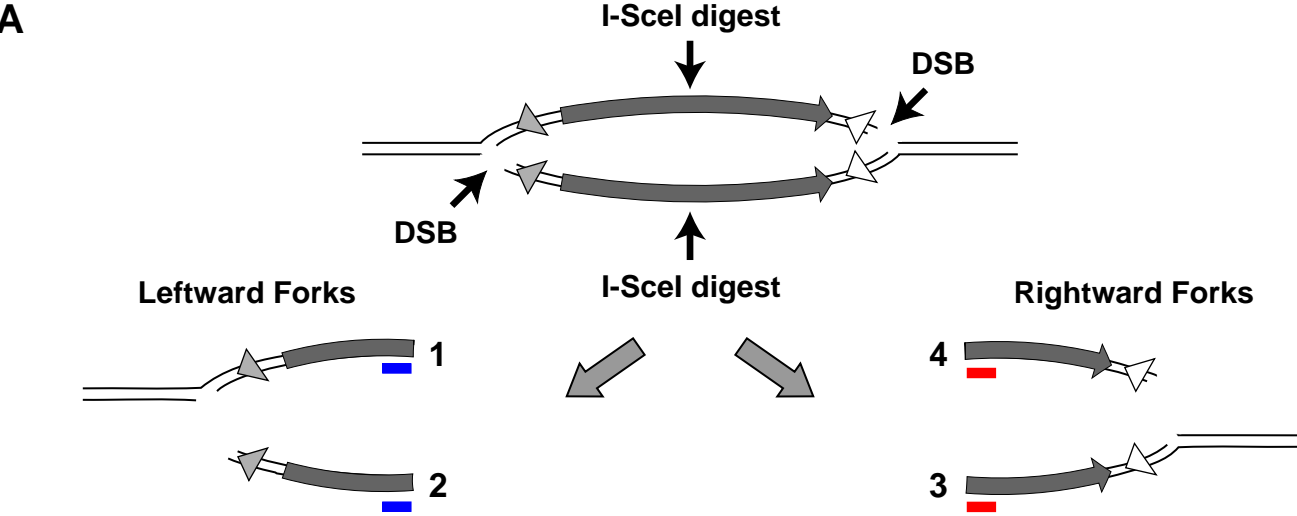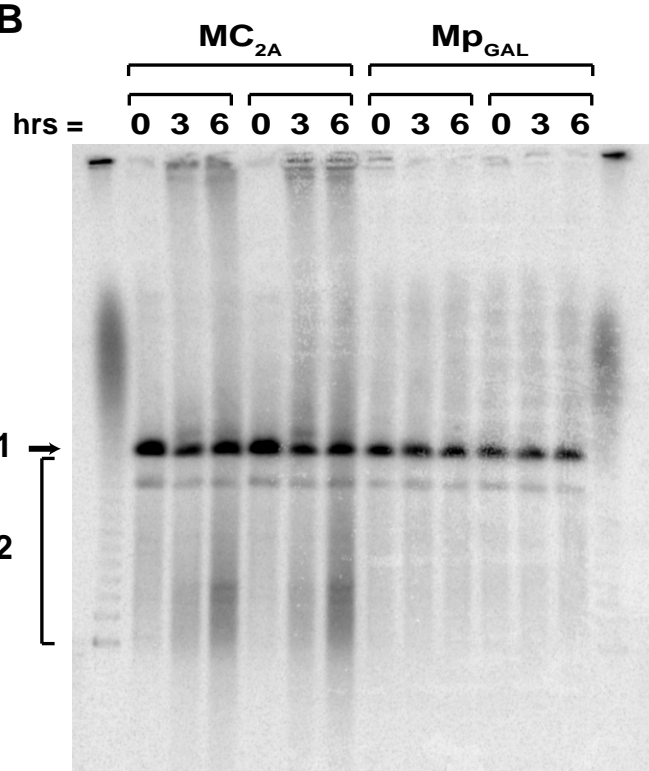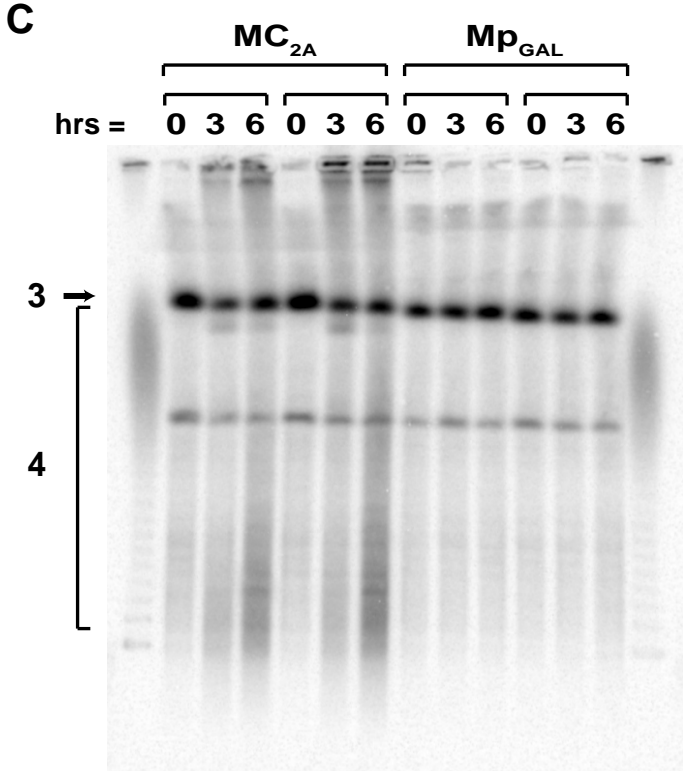

Supplement: S5 (10.1371/journal.pgen.1003192.s005) [file journal.pgen.1003192.s005]
